# Supplementary material for: Changes in Management Lead to Improvement and Healing of Equine Squamous Gastric Disease
Source: MDPI journal article supplement (doi:10.3390/ani13091498), 2023-04-28
Supplement: s1 [file s1]

Supplementary table 1. Macronutrient composition (as-fed basis) of the components of the experimental ration; the compound complementary feed without collagen, hay (88.7% DM) and the mineral feed supplement

| Item (as fed)                                       | Compound complementary feed <sup>1</sup> | Hay <sup>2</sup> | Mineral feed <sup>1</sup> |
|-----------------------------------------------------|------------------------------------------|------------------|---------------------------|
| Crude Protein (g/kg)                                | 115                                      | 73               | 102                       |
| Digestible Crude Protein (VREp) <sup>3</sup> (g/kg) | 82                                       | 53               | 71                        |
| Crude Fat (g/kg)                                    | 32                                       | 12               | 32                        |
| Crude Fiber (g/kg)                                  | 114                                      | 274              | 191                       |
| Crude Ash (g/kg)                                    | 77                                       | 105              | 108                       |
| Starch (g/kg)                                       | 220                                      | -                | 95                        |
| Sugar (g/kg)                                        | 76                                       | 75               | 63                        |
| NDF (g/kg)                                          | 336                                      | 525              | -                         |
| ADF (g/kg)                                          | -                                        | 298              | -                         |
| ADL (g/kg)                                          | -                                        | 32               | -                         |

<sup>1</sup> The compound complementary feed (commercially available as “Voermeesters Basis” and mineral feed (commercially available as “Voermeesters Mineralenbikkels”) was provided by Voermeesters B.V., Marsdijk 31, 4033 CC, Lienden, The Netherlands. Chemical composition of the feed without collagen as declared by the manufacturer is presented. The hydrolyzed collagen was pelleted into the compound complementary feed.

<sup>2</sup> Hay analysis (NIRS) performed by Eurofins Agro, Wageningen, The Netherlands (Order no. 350357/005183689)

<sup>3</sup> Digestible Crude Protein (VREp) values according to the Dutch Feed Evaluation system for horses [Centraal Veevoederbureau. Het EWpa en VREp systeem. CVB documentatierapport No. 31, Centraal Veevoederbureau, Lelystad, the Netherlands 497 (in Dutch), 2004.].
